# Supplementary material for: Differential Contribution of Jasmine Floral Volatiles to the Aroma of Scented Green Tea
Source: Hindawi journal article supplement (doi:10.1155/2017/5849501), 2017-01-01
Supplement: f1 [file 5849501.f1.xlsx]

## Sheet: S-1
		Supplementary Table 1. Volatiles identified in this study
		Compound ID	Compound
		1	(Z)-3-Hexenol
		2	Phenol
		3	Benzaldehyde
		4	Methyl heptenone
		5	β-Myrcene
		6	(Z)-3-Hexenyl Acetate
		7	Octanal
		8	(+)-4-Carene
		9	D-Limonene
		10	(E,E)-2,4-Heptadienal
		11	Benzyl alcohol
		12	Benzeneacetaldehyde
		13	β-Ocimene
		14	γ-Terpinene
		15	1-Octanol
		16	p-Cresol
		17	(E)-Linalool oxide A (furanoid)
		18	(E,E)-3,5-Octadien-2-one
		19	Methyl benzoate
		20	(Z)-Linalool oxide B (furanoid)
		21	β-Linalool
		22	Nonanal
		23	Phenylethyl Alcohol
		24	Benzyl nitrile
		25	Neo-allo-ocimene
		26	Benzyl acetate
		27	Ethyl benzoate
		28	(E)-linalool oxide C (pyranoid)
		29	Methyl benzeneacetate
		30	4-Terpineol
		31	(E)-3-Hexenyl butanoate
		32	Nerol
		33	β-Phenylethyl acetate
		34	Naphthalene
		35	Hotrienol
		36	α-Terpineol
		37	Methyl salicylate
		38	Decanal
		39	Coumaran
		40	β-Cyclocitral
		41	Quinoline
		42	Geraniol
		43	Hexyl butanoate
		44	Ethyl salicylate
		45	Indole
		46	Theaspirane (Isomer 1)
		47	Undecanal
		48	1-Methylnaphthalene
		49	Methyl anthranilate
		50	α-Cubebene
		51	Eugenol
		52	Butyl benzoate
		53	Copaene
		54	Geranyl acetate
		55	2-EthenyInaphthalene
		56	Benzyl 2-methylbutyrate
		57	(Z)-Jasmone
		58	Cada-1,4-diene
		59	o-Methylbenzyl acetate
		60	(Z)-3-Hexenyl benzoate
		61	Hexyl benzoate
		62	Fluorene
		63	Cedrol
		64	t-Cadinol
		65	α-Cadinol
		66	Methyleugenol
		67	Dodecanal
		68	(Z)-3-Hexenyl isopentanoate
		69	α-Ionone
		70	Cinnamyl acetate
		71	Biphenylene
		72	Geranyl acetone
		73	δ-Cadinene
		74	β-Ionone
		75	Benzyl tiglate
		76	α-Farnesene
		77	Benzyl Benzoate
		78	Anthracene
		79	Isopropyl myristate
		80	Caffeine
		81	Methyl hexadecanoate
		82	(+)-α-Ylangene
		83	Melonal
		84	Caryophyllene
		85	β-Cubebene
		86	Aromandendrene
		87	γ-Muurolene
		88	D-Germacrene
		89	α-Cadinene
		90	α-Patchoulene
		91	Nerolidol
		92	Ledol

## Sheet: S-2
		Supplementary Table 2. Volatiles of importance with value of variable of importance more than 1 based on OPLS-DA analysis
		Ranking	Compound ID	Compound	VIP
		1	21	β-Linalool	1.22439
		2	71	Biphenylene	1.21739
		3	27	Ethyl benzoate	1.20526
		4	11	Benzyl alcohol	1.20433
		5	37	Methyl salicylate	1.20268
		6	34	Naphthalene	1.19446
		7	45	Indole	1.18675
		8	9	D-Limonene	1.18642
		9	44	Ethyl salicylate	1.18127
		10	1	(Z)-3-Hexenol	1.17771
		11	48	1-Methylnaphthalene	1.17213
		12	6	(Z)-3-Hexenyl acetate	1.16941
		13	31	(E)-3-Hexenyl butanoate	1.16036
		14	13	β-Ocimene	1.157
		15	14	γ-Terpinene	1.15652
		16	58	Cada-1,4-diene	1.13525
		17	79	Isopropyl myristate	1.13204
		18	12	Benzeneacetaldehyde	1.12369
		19	73	δ-Cadinene	1.12217
		20	19	Methyl benzoate	1.11809
		21	25	Neo-allo-ocimene	1.11729
		22	84	Caryophyllene	1.11723
		23	68	(Z)-3-Hexenyl isopentanoate	1.11519
		24	10	(E,E)-2,4-Heptadienal	1.11313
		25	5	β-Myrcene	1.11219
		26	62	Fluorene	1.11147
		27	91	Nerolidol	1.1108
		28	82	(+)-α-Ylangene	1.11043
		29	86	Aromandendrene	1.10868
		30	2	Phenol	1.10468
		31	53	Copaene	1.10148
		32	22	Nonanal	1.0989
		33	89	α-Cadinene	1.09373
		34	85	β-Cubebene	1.09344
		35	50	α-Cubebene	1.09207
		36	16	p-Cresol	1.07827
		37	81	Methyl hexadecanoate	1.07781
		38	59	o-Methylbenzyl acetate	1.0762
		39	78	Anthracene	1.07039
		40	65	α-Cadinol	1.0649
		41	35	Hotrienol	1.06407
		42	80	Caffeine	1.06189
		43	88	Germacrene D	1.06054
		44	20	(Z)-linalool oxide (furanoid)	1.0521
		45	41	Quinoline	1.04949
		46	18	(E,E)-3,5-Octadien-2-one	1.04554
		47	24	Benzyl nitrile	1.04269
		48	15	1-Octanol	1.04152
		49	90	α-Patchoulene	1.04004
		50	28	(E)-linalool oxide (pyranoid),	1.02476
		51	39	Coumaran	1.01787
		52	23	Phenylethyl alcohol	1.01777
		53	76	α-Farnesene	1.01078
		54	92	Ledol	1.00486

## Sheet: S-3
		Supplementary Table 3. Volatiles not common to all the three samples examiend in this study.
		Volatile compounds	Non-scented tea	Scented tea	Jasmine flower
			(mg.kg-1)	(mg.kg-1)	(mg.kg-1)
		Phenylethyl Alcohol	0.718±0.247 a	0.815±0.120 a	ND b
		(E)-linalool oxides (pyranoid)	0.633±0.164 a	0.766±0.059 a	ND b
		Undecanal	0.596±0.212 a	0.756±0.105 a	ND b
		α-Ionone	0.245±0.045 a	0.552±0.188 a	ND b
		Geranyl acetone *	1.245±0.585 a	1.674±0.270 a	ND b
		Anthracene	1.752±0.174 a	1.716±0.545 a	ND b
		Methyl hexadecanoate	2.051±0.546 a	2.081±0.162 a	ND b
		Phenol	0.328±0.066 a	ND b	ND b
		Octanal	0.533±0.435 a	ND a	ND a
		(E,E)-2,4-Heptadienal	0.351±0.035 a	ND b	ND b
		Benzeneacetaldehyde	0.404±0.025 a	ND b	ND b
		1-Octanol	0.388±0.155 a	ND b	ND b
		p-Cresol	0.337±0.101 a	ND b	ND b
		(E,E)-3,5-Octadien-2-one	0.237±0.092 a	ND b	ND b
		Methyl benzoate	0.759±0.095 a	ND b	ND b
		Coumaran	0.601±0.306 a	ND b	ND b
		Quinoline	0.392±0.149 a	ND b	ND b
		2-EthenyInaphthalene	0.234±0.155 a	ND b	ND b
		Fluorene	0.931±0.113 a	ND b	ND b
		Dodecanal	0.620±0.314 a	ND b	ND b
		Methyl benzeneacetate	ND b	0.240±0.053 a	ND b
		Benzyl 2-methylbutyrate	ND b	2.104±0.107 a	ND b
		Theaspirane (Isomer 1)	ND b	0.386±0.040 a	ND b
		4-Terpineol	ND b	0.346±0.027 a	ND b
		(+)-4-Carene	ND b	0.333±0.027 a	ND b
		Nerol	ND b	1.918±0.932 a	ND b
		Eugenol	ND b	8.736±1.518 a	ND b
		Butyl benzoate	ND b	1.478±0.093 a	ND b
		Hexyl benzoate	ND b	1.425±0.133 a	ND b
		Methyleugenol	ND b	1.079±0.400 a	ND b
		Cinnamyl acetate	ND b	1.039±0.346 a	ND b
		Benzyl tiglate	ND b	7.178±1.292 a	ND b
		β-Phenethyl acetate	ND b	4.877±0.019 a	3.282±1.662 a
		(Z)-Linalool oxide (furanoid)	ND b	ND b	17.380±7.441 a
		Hotrienol	ND b	ND b	5.122±1.932 a
		Benzyl nitrile	ND b	ND b	3.553±1.303 a
		Hexyl butanoate	ND b	ND b	1.050±0.955 a
		(Z)-3-Hexenyl isopentanoate	ND b	ND b	9.940±2.051 a
		o-Methylbenzyl acetate	ND b	ND b	1.878±0.882 a
		(+)-α-Ylangene	ND b	ND b	4.963±0.604 a
		Melonal	ND b	ND b	17.389±11.966 a
		Caryophyllene	ND b	ND b	43.941±2.288 a
		β-Cubebene	ND b	ND b	14.980±3.519 a
		Aromandendrene	ND b	ND b	25.263±3.433 a
		γ-Muurolene	ND b	ND b	33.253±28.581 a
		D-Germacrene	ND b	ND b	103.880±40.770 a
		α-Cadinene	ND b	ND b	46.165±10.768 a
		α-Patchoulene	ND b	ND b	2.293±1.095 a
		Nerolidol	ND b	ND b	12.515±1.484 a
		Ledol	ND b	ND b	2.336±1.442 a
		* Abundances of the compounds were determined based on standard curve.
		Data show the mean ± standard deviation (SD). Statistical significance was analyzed using ANOVA. Means followed by the same letter are not significantly different (p > 0.05).

## Sheet: S-4
		Supplementary Table 4. Odor threshold values of some volatiles detected in this study.
		Compounds	Threshold value (ppb)	Aroma Quality	References
		β-Myrcene	4.9	Herbaceous, woody	http://www.leffingwell.com/odorthre.htm
		Limonene	10	Citrus, terpenic	http://www.leffingwell.com/odorthre.htm
		(E)-β-Ocimene	340	Green, terpenic	http://www.leffingwell.com/odorthre.htm
		β-Ocimene	34	Sweet	http://www.leffingwell.com/odorthre.htm
		(Z)-linalool oxides (furanoid)	6	Floral green	https://www.ncbi.nlm.nih.gov/pubmed/25148991
		(E)-linalool oxides (furanoid)	6	Fruity	https://www.ncbi.nlm.nih.gov/pubmed/25148991
		Linalool	0.8	Floral, fruity	http://onlinelibrary.wiley.com/doi/10.1002/ffj.1633/abstract
		Hotrienol	110	Ginger like	http://www.sciencedirect.com/science/article/pii/S221345301500018X
		Epoxylinalol	6	Sweet, woody	https://www.ncbi.nlm.nih.gov/pubmed/25148991
		α-Terpineol	330	Floral, sweet	https://www.ncbi.nlm.nih.gov/pubmed/25148991
		Nerol	300	Rose, lime	https://www.ncbi.nlm.nih.gov/pubmed/25148991
		Geraniol	3.2	Sweet floral	http://www.sciencedirect.com/science/article/pii/S221345301500018X
		Citral	30	Citrus, lemon	http://www.leffingwell.com/odorthre.htm
		Geranyl acetone	60	Fresh, rosy	http://www.leffingwell.com/odorthre.htm
		β-Ionone	0.007	Dry, floral, fruity	http://www.sciencedirect.com/science/article/pii/S221345301500018X
		(E)-Nerolidol	2250	Floral, woody	http://www.leffingwell.com/odorthre.htm
		Methyl salicylate	40	Wintergreen like	https://www.ncbi.nlm.nih.gov/pubmed/25148991
		Butyl butanoate	100	Rotten apple	http://www.leffingwell.com/odorthre.htm
		(Z)-3-Hexenyl acetate	31	Green; banana-like	http://www.leffingwell.com/odorthre.htm
		Benzeneacetaldehyde	4	Green	http://www.leffingwell.com/odorthre.htm
		(E)-2-Hexenal	17	Green apple-like, bitter almond-like	http://www.leffingwell.com/odorthre.htm
		Nonanal	1	Fatty, citrus, green	http://www.leffingwell.com/odorthre.htm
		Heptanal	3	Fatty green	http://www.leffingwell.com/odorthre.htm
		Decanal	2	citrus	http://www.leffingwell.com/odorthre.htm
		(Z)-3-Hexen-1-ol	13	Lettuce-like	http://www.sciencedirect.com/science/article/pii/S221345301500018X
		3-Octen-1-ol	1	Green, meaty	https://www.ncbi.nlm.nih.gov/pubmed/25148991
		Naphthalene	5	naphthalene	https://www.ncbi.nlm.nih.gov/pubmed/18081248
		Indole	1	Faecal, animal-like	https://www.ncbi.nlm.nih.gov/pubmed/21664180
		(Z)-Jasmone	1.9	Floral, jasmine-like	Dilution to minimum olfactory concentration
		Benzaldehyde	990	Sweet, almond, cherry	https://www.ncbi.nlm.nih.gov/pubmed/24099139
		Phenol	5900	Phenolic, plastic, rubbery	http://www.leffingwell.com/odorthre.htm
		a-Ionone	2.6	Sweet, floral, woody	http://onlinelibrary.wiley.com/doi/10.1002/1097-0010(20000901)80:11%3C1659::AID-JSFA693%3E3.0.CO;2-6/abstract
		Octanal	0.7	Aldehydic, waxy, citrus	https://www.ncbi.nlm.nih.gov/pubmed/26257073
		Nerolidol	10	Floral, green, citrus	http://www.academia.edu/7829324/Alcohols_and_Ethers_Flavor_and_odor_characteristics_and_effects_in_formulations
		Methyl anthranilate	3	Sweet, fruity, grape	http://www.ajevonline.org/content/65/4/424
		(E,E)-2,4-heptadienal	56	Fatty, green, greasy	https://www.ncbi.nlm.nih.gov/pubmed/26257073
